# Supplementary material
Source: PubMed Central journal article supplement (PMC4283202)
Supplement: NIHMS650061-supplement-suppl_data.pdf [file NIHMS650061-supplement-suppl_data.pdf]

# **SUPPLEMENTAL MATERIAL**

## SUPPLEMENTAL TABLE I. Factors Tested During the Statistical Analysis

- Age at Transplantation (Tx)
- Body Mass Index
- LVAD placement before Tx
- Prior Cerebral Vascular Accident
- Peripheral Vascular Disease
- Coronary Artery Disease
- Diabetes
- Hypertension
- Smoker
- Prior Cancer
- Prior Myocardial Infarction
- Prior COPD
- HIV status (positive)
- Amyloidosis
- Prior Cardiothoracic Surgeries(>2)
- Renal Failure requiring dialysis
- LV Ejection Fraction
- Alternative Listing Status
- Sex (female)
- Re-Transplant
- GFR-MDRD
- African-American Race
- Hispanic Race
- Caucasian Race
- Cardiopulmonary Bypass Time
- Cross-clamp Time
- Donor Ischemic Time
- Donor Age
- Pre-Tx Triglycerides
- Pre-Tx Cholesterol
- Pre-Tx HDL
- Pre-Tx LDL
- Pre-Tx BUN
- Pre-Operative Creatinine
- Pre-Tx Glucose
- Pre-Tx Calcium
- Pre-Tx Hematocrit
- Pre-Tx Hemoglobin
- Pre-Tx MCV
- Pre-Tx Platelet
- Pre-Tx Total Protein
- Pre-Tx Albumin
- Pre-Tx Total Bilirubin
- Pre-Tx AST
- Pre-Tx ALT
- Pre-Tx TAP
- Pre-Tx GGT
- Pre-Tx PT
- Pre-Tx PTT
- Pre-Tx INR
- Pre-Tx TSH
- Pre-Tx T4
- Pre-Tx Ferritin
- Pre-Tx TIBC
- Pre-Tx Iron

**SUPPLEMENTAL TABLE II. Distribution of Scores in Patients on the Regular and High**

**Risk Alternate List**

| <b>Score</b> | <b>Regular List<br/>(n=711)</b> | <b>High Risk List<br/>(n=111)</b> |
|--------------|---------------------------------|-----------------------------------|
| 0 (n, %)     | 395 (55.6)                      | 49 (44.1)                         |
| 1 (n, %)     | 58 (8.2)                        | 16 (14.4)                         |
| 2 (n, %)     | 191 (26.9)                      | 28 (25.2)                         |
| 3 (n, %)     | 32 (4.5)                        | 7 (6.3)                           |
| 4 (n, %)     | 26 (3.7)                        | 5 (4.5)                           |
| 5 (n, %)     | 7 (1.0)                         | 2 (1.8)                           |
| 6 (n, %)     | 1 (0.001)                       | 2 (1.8)                           |
| 7 (n, %)     | 1 (0.001)                       | 2 (1.8)                           |
